# Supplementary material for: CSF-1–dependant donor-derived macrophages mediate chronic graft-versus-host disease
Source: JCI journal article supplement (doi:10.1172/jci75935), 2014-08-25
Supplement: sd1 [file 1]

## Supplemental figure 1.

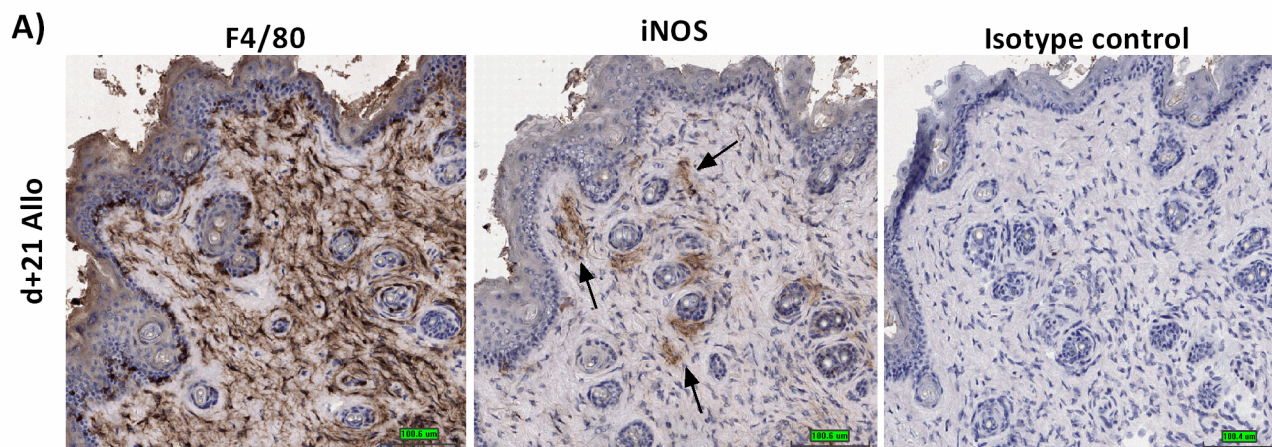

***Supplemental Figure 1. F4/80<sup>+</sup> macrophages express low levels of iNOS 21 days post-transplant***

A) Representative IHC images of from lethally irradiated B6 recipients that received G-CSF mobilised Balb/c (CD45.1) grafts. IHC for F4/80 and iNOS expression illustrates that at 21 days post-transplant minimal F4/80<sup>+</sup> cells are iNOS positive. Specificity of staining was confirmed using a matched isotype control. Slides viewed using Aperio Image Scope software at x5 magnification.

## Supplemental Figure 2.

### A) MGreen BM + T → B6D2F1 d+7

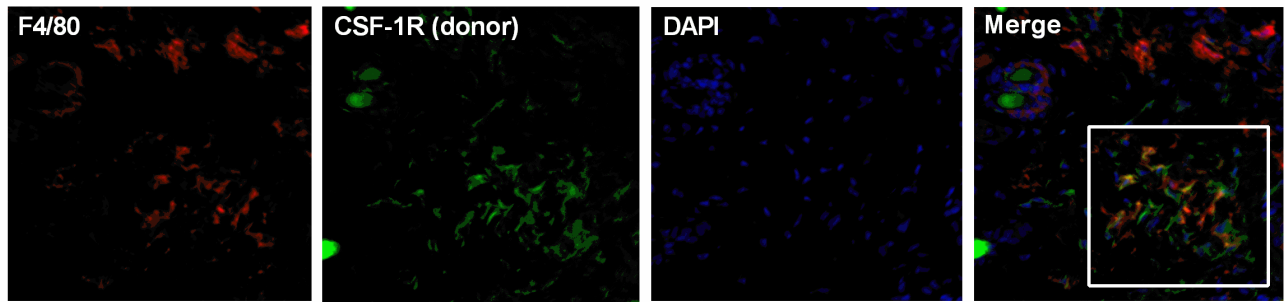

### B) B6 BM + T → B6D2F1 d+21

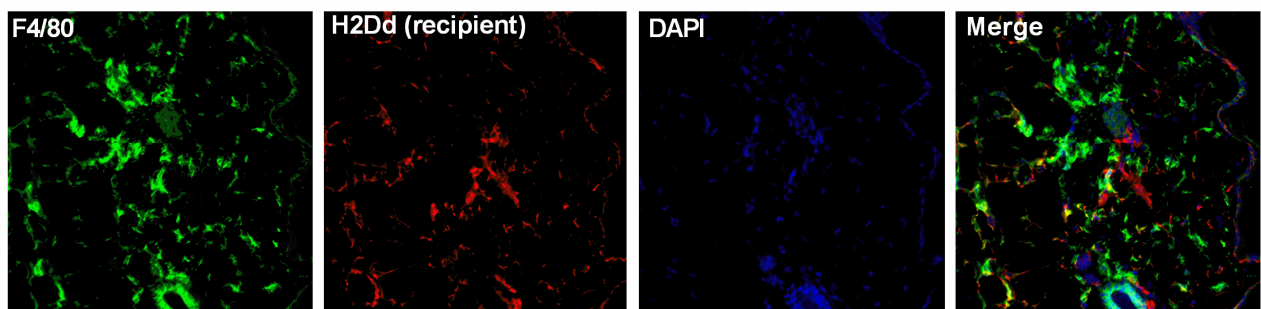

### *Supplemental Figure 2. Distribution of donor and host macrophages post-transplant.*

A) Representative IF images at 7 days post-transplant from skin of lethally irradiated B6D2F1 recipients which received BM + T cell grafts from MacGreen mice (CSF-1R promoter driving eGFP). IF confirms the presence of donor macrophages (F4/80<sup>+</sup>CSF-1R<sup>+</sup>) in the skin by day 7 post-transplant (Boxed area in merged image). B) Representative IF images at 21 days post-transplant from skin of lethally irradiated B6D2F1(H2D<sup>d</sup>) recipients which received BM + T cell grafts from C57Bl/6 mice. IF illustrates that by 21 days post-transplant there are few H2D<sup>d</sup> (Red) cells that are F4/80<sup>+</sup> (Green), with the majority of F4/80<sup>+</sup> cells (Green) being H2D<sup>neg</sup> (i.e. very minimal numbers of merged yellow cells). Images were captured using an Applied precision delta vision deconvolution microscope (x20 magnification), viewed using ImageJ 1.44p.

### Supplemental Figure 3.

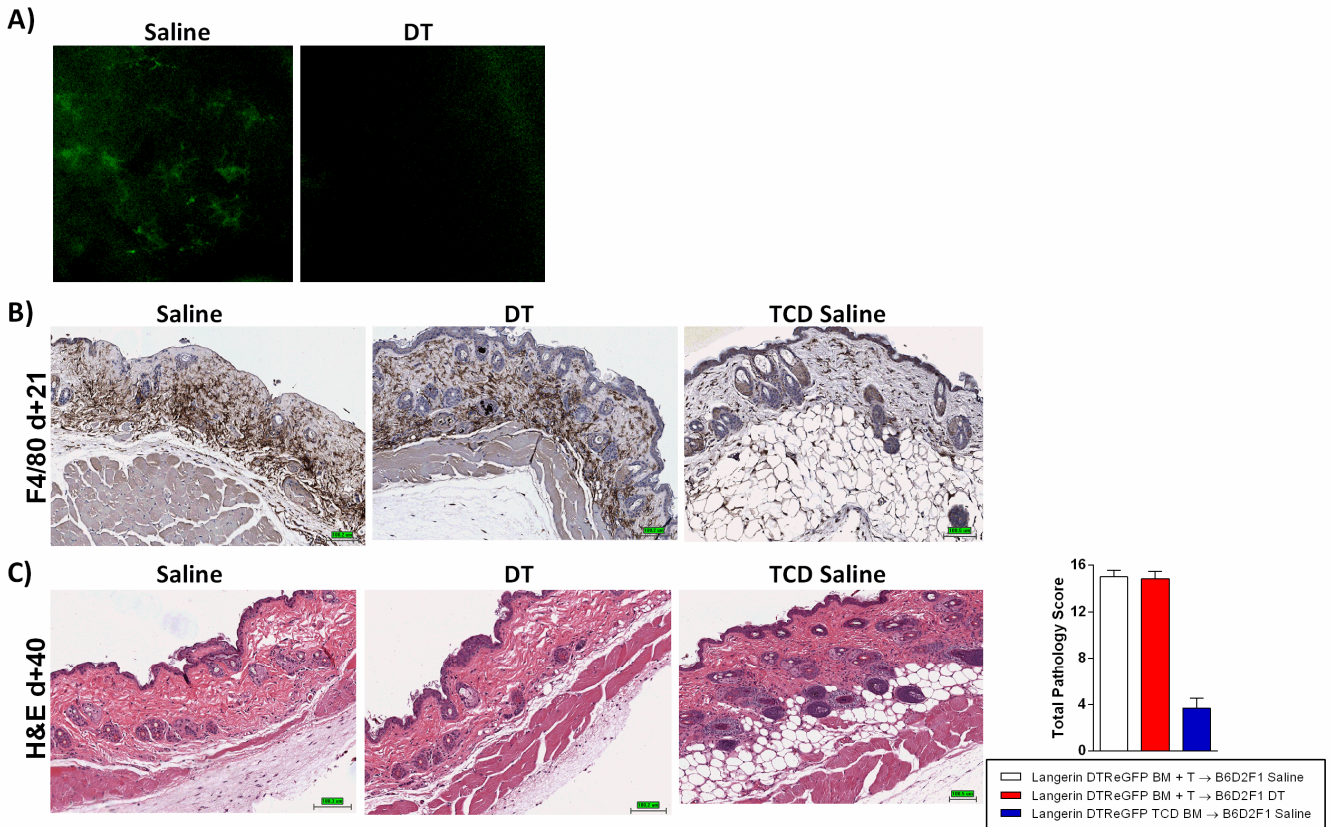

### Supplemental Figure 3. Langerhans cells do not contribute to chronic GVHD in skin

A) Representative IF images from lethally irradiated B6D2F1 recipients that received BM + T cell grafts from langerin-DTReGFP mice and treated with saline or DT from *d*+7 to *d*+40 . Image illustrates the depletion of eGFP<sup>+</sup> cells in the epidermis after DT treatment. B) IHC for F4/80 expression at *d*+21 confirms that administration of DT did not affect F4/80<sup>+</sup> macrophage infiltration. C) H&E images and semi-quantitative histopathology, confirmed that depletion of langerin<sup>+</sup> cells post-transplant did not alter cutaneous pathology (*p*=0.861) (*n*=5 saline, *n*=6 DT, *n*=3 TCD Saline). Statistical comparisons were calculated using 2-tailed Mann Whitney tests and data is represented as mean ± SEM. IF images were viewed on an Olympus BX61 Nuance microscope (x63 magnification), images viewed using ImageJ 1.44p. H&E slides viewed using Aperio Image Scope software at x5 magnification.

## Supplemental Figure 4.

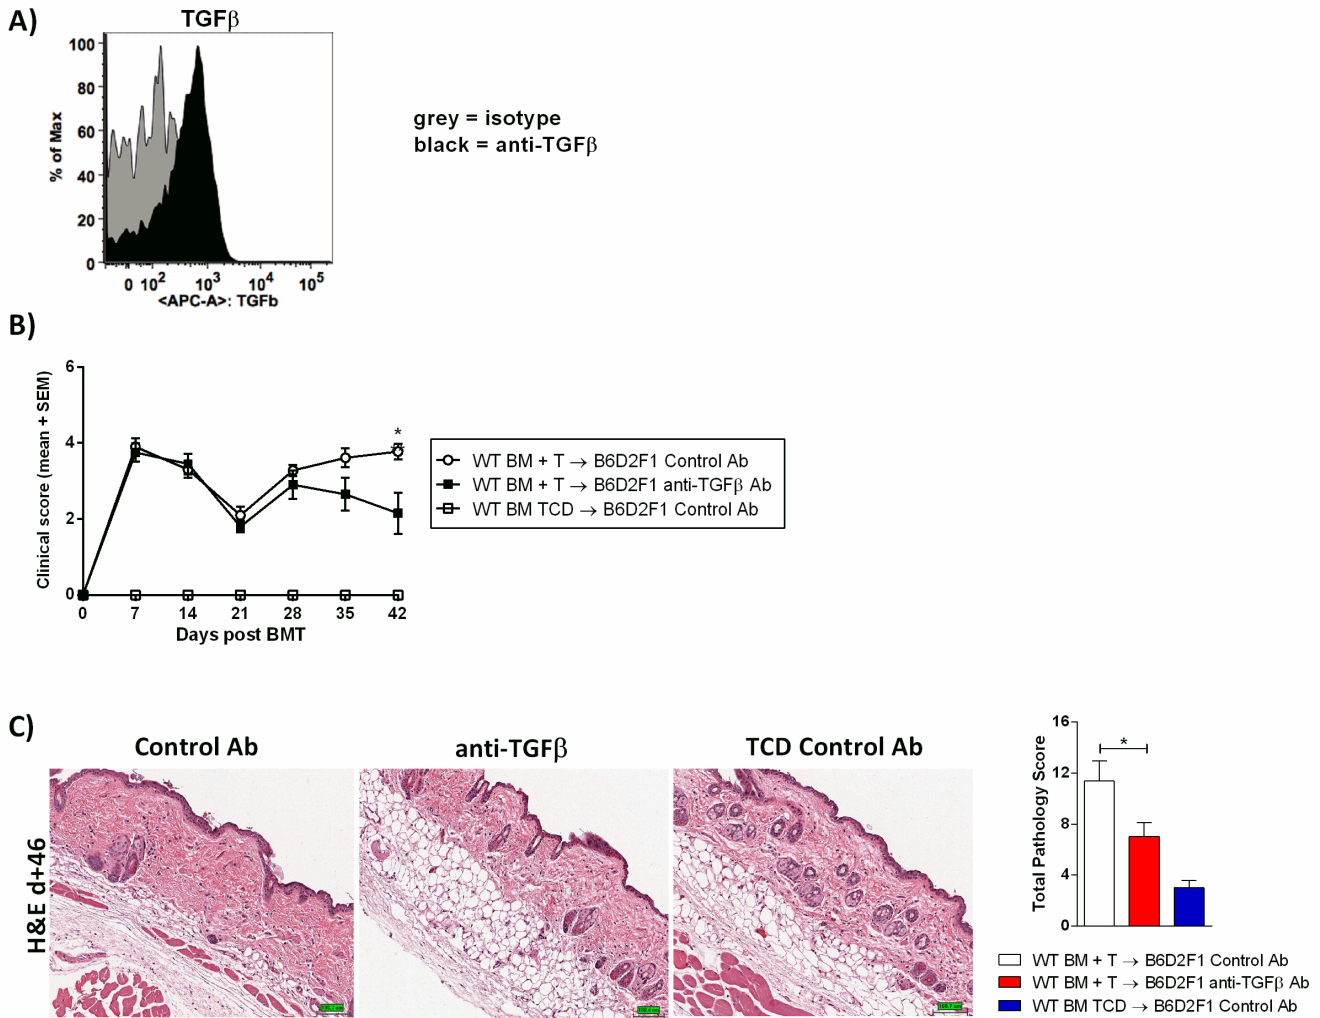

### Supplemental Figure 4. TGF- $\beta$ blockade post-transplant attenuates chronic GVHD.

A) Representative FACS histogram illustrating TGF- $\beta$  expression by CD11b<sup>+</sup>F4/80<sup>+</sup>Ly6C<sup>lo</sup> PB monocytes from B6D2F1 recipients of B6 BM + T grafts on d+46 post-transplant after 2hr culture with 100ng LPS. Gating strategy is the same as shown in figure 3. B) Lethally irradiated B6D2F1 recipients of B6 BM + T cells grafts were treated with either control or anti-TGF $\beta$  antibody from d+7 to d+46 post-transplant (20ug/3x weekly). Mice which received anti-TGF $\beta$  treatment had a significantly lower GVHD clinical scores by d+42 post-transplant (\*p=0.035). C) H&E images and semi-quantitative histopathology, confirmed that anti-TGF $\beta$  treatment post-transplant resulted in a significant reduction in cutaneous pathology (\*p=0.018; n=8 control Ab, n=11 anti-TGF $\beta$ , n=3 TCD control Ab). Statistically significant differences were calculated using 2-tailed Mann Whitney test and data is represented as mean  $\pm$  SEM. Slides viewed using Aperio Image Scope software at x5 magnification.
